# Supplementary material for: Increased thalamic resting‐state connectivity as a core driver of LSD‐induced hallucinations
Source: PubMed Central journal article supplement — Acta Psychiatr Scand. 2017 Sep 21;136(6):648–57. doi: 10.1111/acps.12818 (PMC5698745; doi:10.1111/acps.12818), 2017-09-21
Supplement: ACPS-136-648-s001.pdf [file ACPS-136-648-s001.pdf]

Müller et al.

## **Increased thalamic resting state connectivity as a core driver of LSD-induced hallucinations**

### **Supporting Information**

#### **Supporting material and methods**

##### Participants

24 Subjects were recruited by advertisement and word of mouth. Exclusion criteria were age <25 or >65 years, pregnancy (as determined by urine test), nursing, hypertension (>140/90 mmHg) or hypotension (SBP<85 mmHg), cardiac or neurological disorders, use of contraindicated medication or medication that could interfere with effects of the study medication (as determined by medical history and general medical examination including ECG, blood chemistry and haematology), use of illicit drugs (except cannabis) >10 times or any time within the previous two months (as assessed by history and urine tests), smoking >10 cigarettes/day, history of drug dependence, personal or first degree relative with an axis I major psychiatric disorder (as determined by general medical history and a semi-structured interview for DSM-IV). Subjects received monetary compensation for their participation.

##### Study procedure

The study included a screening visit, two 25-hour test sessions and an end of study visit. The experimental sessions took place in a quiet standard patient room at the University Hospital of Basel, Switzerland. Study session dates were between December 2014 (first subject screened) and September 2015 (last end of study visit). Participants were monitored for adverse events during the study sessions and the end of study visit. Participants were instructed to abstain from any illicit drugs during the whole study period and additionally to

abstain from caffeine, chocolate and alcohol for at least 8 h before the sessions. Urine drug tests were performed before every study session. In women, pregnancy tests were performed prior to every session. Except for tetrahydrocannabinol, which can be detected for several weeks, detection of any other drug resulted in study exclusion. A light standardised breakfast was served at both sessions.

Table S1: Cumulative lifetime use by the included subjects of legal and illicit drugs

|                                    |                 |                                    |               |
|------------------------------------|-----------------|------------------------------------|---------------|
| Nicotine                           |                 | Stimulants                         |               |
| No. of subjects with regular use   | 7/20            | No. subjects with any use          | 5/20          |
| Cigarettes per day (mean/SD/range) | 1.85/3.44/0-10  | Lifetime occasions (mean/SD/range) | 0.45/0.83/0-2 |
| Caffeine                           |                 | Sedatives                          |               |
| No. of subjects with regular use   | 19/20           | No. subjects with any use          | 0/20          |
| Units per day (mean/SD/range)      | 2.60/1.88/0-8   | Lifetime occasions (mean/SD/range) | 0/0/0         |
| Alcohol                            |                 | Psychedelics                       |               |
| No. of subjects with regular use   | 20/20           | No. subjects with any use          | 2/20          |
| Units per week (mean/SD/range)     | 4.20/2.75/1-10  | Lifetime occasions (mean/SD/range) | 0.10/0/0-1    |
| Cannabis                           |                 | Opioids                            |               |
| No. subjects with any use          | 14/20           | No. subjects with any use          | 1/20          |
| Lifetime occasions (mean/SD/range) | 7.05/12.42/0-50 | Lifetime occasions (mean/SD/range) | 0.05/0.23/0-1 |
| MDMA                               |                 | Others                             |               |
| No. subjects with any use          | 7/20            | No. subjects with any use          | 0/20          |
| Lifetime occasions (mean/SD/range) | 0.85/1.44/0-3   | Lifetime occasions (mean/SD/range) | 0/0/0         |

## Drugs and randomisation

Gelatin capsules containing 100 µg D-lysergic acid diethylamide (Lipomed AG, Arlesheim, Switzerland) and identical capsules containing mannitol were prepared. Each subject received either placebo or LSD on two study sessions in a balanced manner. Only the person dispensing the capsules (who was not further involved in conducting the study) was aware of the treatment assignment. Subjects and study personnel monitoring the sessions were blind to the treatment order.

## Assessments of subjective drug effects and plasma levels

The 5D-ASC consists of 94 items, that measure the following five major dimensions and their corresponding subscales (in brackets): “Oceanic boundlessness” (“experience of unity”, “spiritual experience”, “blissful state”, “insightfulness”), “anxious ego dissolution” (“disembodiment”, “impaired control” and “cognition”, “anxiety”), “visionary restructuralization” (“complex imagery”, “elementary imagery”, “audio-visual synthaesia”, “changed meaning of percepts”), “auditory alterations”, and “reduction of vigilance” (both without subscales).

# Supporting results

**A**  
LSD > Placebo

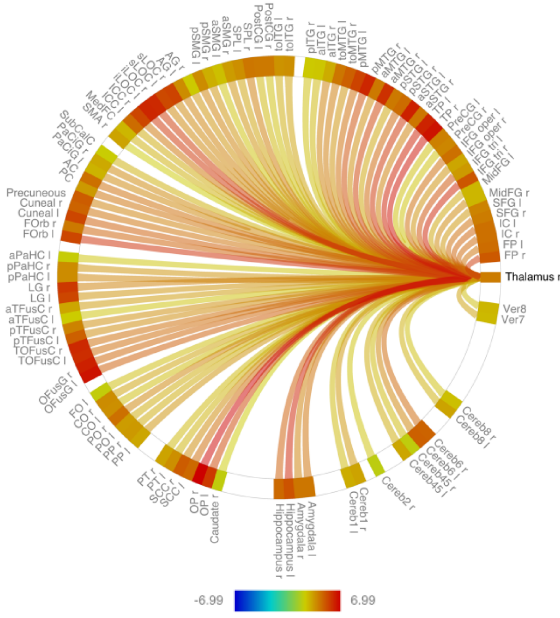

**B**  
LSD > Placebo

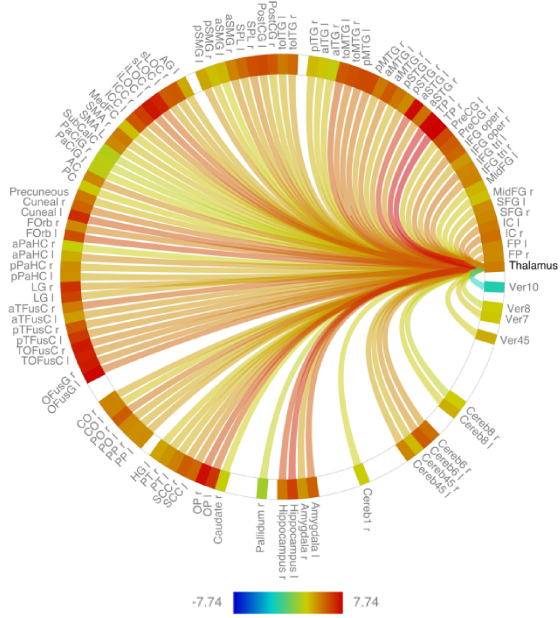

Figure S1: Connectome ring showing the results of the ROI-to-ROI-analysis using the right (A) and left (B) thalamus as sources and ROIs covering the whole brain as targets (see Table S2 for ROI labels). Results are corrected for multiple comparisons across all ROI-pairs ( $p < 0.05$ , FDR). The colour bar represents the t value.

Table S2: Results of the ROI-to-ROI analysis using the right and left thalamus as seeds and ROIs covering the whole brain as targets. Results are corrected for multiple comparisons across all ROI-pairs (2x130,  $p < 0.05$ , FDR).

|              |                                                   | Right thalamus |        | Left thalamus |        |
|--------------|---------------------------------------------------|----------------|--------|---------------|--------|
| Abbreviation | Full description                                  | t              | p, FDR | t             | p, FDR |
| AC           | Cingulate Gyrus, anterior division                | 4.62           | 0.0009 | 4.46          | 0.0011 |
| Accumbens l  | -                                                 | -              | -      | -             | -      |
| Accumbens r  | -                                                 | -              | -      | -             | -      |
| AG l         | Angular Gyrus Left                                | 4.13           | 0.0018 | 3.57          | 0.0041 |
| AG r         | Angular Gyrus Right                               | 3.75           | 0.0031 | -             | -      |
| aITG l       | Inferior Temporal Gyrus, anterior division Left   | 2.95           | 0.013  | 2.99          | 0.0121 |
| aITG r       | Inferior Temporal Gyrus, anterior division Right  | 4.14           | 0.0018 | 3.16          | 0.0088 |
| aMTG l       | Middle Temporal Gyrus, anterior division Left     | 3.84           | 0.0027 | 3.72          | 0.0032 |
| aMTG r       | Middle Temporal Gyrus, anterior division Right    | 5.64           | 0.0003 | 4.73          | 0.0008 |
| Amygdala l   | -                                                 | 4.54           | 0.001  | 5.53          | 0.0003 |
| Amygdala r   | -                                                 | 4.14           | 0.0018 | 3.91          | 0.0024 |
| aPaHC l      | Parahippocampal Gyrus, anterior division Left     | 2.61           | 0.0237 | 4.26          | 0.0015 |
| aPaHC r      | Parahippocampal Gyrus, anterior division Right    |                |        | 2.49          | 0.0302 |
| aSMG l       | Supramarginal Gyrus, anterior division Left       | 2.64           | 0.0225 | 2.66          | 0.0221 |
| aSMG r       | Supramarginal Gyrus, anterior division Right      | 3.78           | 0.003  | 4.31          | 0.0014 |
| aSTG l       | Superior Temporal Gyrus, anterior division Left   | 5.91           | 0.0002 | 6.52          | 0.0001 |
| aSTG r       | Superior Temporal Gyrus, anterior division Right  | 4.2            | 0.0017 | 4.12          | 0.0018 |
| aTFusC l     | Temporal Fusiform Cortex, anterior division Left  | 2.63           | 0.023  | 4.15          | 0.0017 |
| aTFusC r     | Temporal Fusiform Cortex, anterior division Right | 3.62           | 0.0038 | 5.53          | 0.0003 |
| Brain-Stem   | -                                                 | -              | -      | -             | -      |
| Caudate l    | -                                                 | -              | -      | -             | -      |
| Caudate r    | -                                                 | 2.44           | 0.0331 | 2.65          | 0.0223 |
| Cereb1 l     | Cerebellum Crus1 Left                             | 2.89           | 0.0144 | -             | -      |
| Cereb1 r     | Cerebellum Crus1 Right                            | 3.66           | 0.0035 | -             | -      |
| Cereb10 l    | Cerebellum 10 Left                                | -              | -      | -             | -      |
| Cereb10 r    | Cerebellum 10 Right                               | -              | -      | -             | -      |
| Cereb2 l     | Cerebellum Crus2 Left                             | -              | -      | -             | -      |
| Cereb2 r     | Cerebellum Crus2 Right                            | 2.63           | 0.0229 |               |        |
| Cereb3 l     | Cerebellum 3 Left                                 | -              | -      | -             | -      |
| Cereb3 r     | Cerebellum 3 Right                                | -              | -      | -             | -      |
| Cereb45 l    | Cerebellum 4 5 Left                               | 3.19           | 0.0085 | 3.72          | 0.0032 |

|               |                                                   |      |        |      |        |
|---------------|---------------------------------------------------|------|--------|------|--------|
| Cereb45 r     | Cerebellum 4 5 Right                              | 2.87 | 0.0149 | 3.47 | 0.005  |
| Cereb6 l      | Cerebellum 6 Left                                 | 4.12 | 0.0018 | 4.28 | 0.0014 |
| Cereb6 r      | Cerebellum 6 Right                                | 4.72 | 0.0008 | 4.35 | 0.0013 |
| Cereb7 l      | Cerebellum 7b Left                                | -    | -      | -    | -      |
| Cereb7 r      | Cerebellum 7b Right                               | -    | -      | -    | -      |
| Cereb8 l      | Cerebellum 8 Left                                 | 3.05 | 0.0108 | 2.8  | 0.0169 |
| Cereb8 r      | Cerebellum 8 Right                                | 2.74 | 0.0188 | 2.24 | 0.0484 |
| Cereb9 l      | Cerebellum 9 Left                                 | -    | -      | -    | -      |
| Cereb9 r      | Cerebellum 9 Right                                | -    | -      | -    | -      |
| CO l          | Central Opercular Cortex Left                     | 2.81 | 0.0169 | 3.07 | 0.0105 |
| CO r          | Central Opercular Cortex Right                    | 3.34 | 0.0062 | 3.65 | 0.0035 |
| Cuneal l      | Cuneal Cortex Left                                | 4.97 | 0.0006 | 5.83 | 0.0002 |
| Cuneal r      | Cuneal Cortex Right                               | 4.54 | 0.001  | 4.9  | 0.0007 |
| FO l          | Frontal Operculum Cortex Left                     | 2.8  | 0.0169 | -    | -      |
| FO r          | Frontal Operculum Cortex Right                    | -    | -      | -    | -      |
| FOrb l        | Frontal Orbital Cortex Left                       | 6.02 | 0.0002 | 5.9  | 0.0002 |
| FOrb r        | Frontal Orbital Cortex Right                      | 4.92 | 0.0006 | 4.71 | 0.0008 |
| FP l          | Frontal Pole Left                                 | 4.54 | 0.001  | 3.77 | 0.0031 |
| FP r          | Frontal Pole Right                                | 5.83 | 0.0002 | 4.33 | 0.0014 |
| HG l          | Heschl's Gyrus Left                               | -    | -      | -    | -      |
| HG r          | Heschl's Gyrus Right                              | -    | -      | -    | -      |
| Hippocampus l | -                                                 | 6.37 | 0.0001 | 6.88 | 0.0001 |
| Hippocampus r | -                                                 | 4.98 | 0.0006 | 5.97 | 0.0002 |
| IC l          | Insular Cortex Left                               | 4.88 | 0.0007 | 4.68 | 0.0009 |
| IC r          | Insular Cortex Right                              | 4.75 | 0.0008 | 4.99 | 0.0006 |
| ICC l         | Intracalcarine Cortex Left                        | 3.25 | 0.0074 | 3.5  | 0.0048 |
| ICC r         | Intracalcarine Cortex Right                       | 4.44 | 0.0011 | -    | -      |
| IFG oper l    | Inferior Frontal Gyrus, pars opercularis Left     | 4.7  | 0.0008 | -    | -      |
| IFG oper r    | Inferior Frontal Gyrus, pars opercularis Right    | 3.82 | 0.0028 | 3.61 | 0.0038 |
| IFG tri l     | Inferior Frontal Gyrus, pars triangularis Left    | 5.24 | 0.0004 | 5.11 | 0.0005 |
| IFG tri r     | Inferior Frontal Gyrus, pars triangularis Right   | 6.28 | 0.0001 | 4.46 | 0.0011 |
| iLOC l        | Lateral Occipital Cortex, inferior division Left  | 5.87 | 0.0002 | 5.51 | 0.0003 |
| iLOC r        | Lateral Occipital Cortex, inferior division Right | 5.77 | 0.0002 | 5.23 | 0.0004 |
| LG l          | Lingual Gyrus Left                                | 3.76 | 0.0031 | 3.68 | 0.0034 |
| LG r          | Lingual Gyrus Right                               | 4.17 | 0.0017 | 3.98 | 0.0022 |
| MedFC         | Frontal Medial Cortex                             | 3.06 | 0.0107 | 2.86 | 0.0153 |
| MidFG l       | Middle Frontal Gyrus Left                         | 3.33 | 0.0064 | 2.94 | 0.0134 |
| MidFG r       | Middle Frontal Gyrus Right                        | 4.06 | 0.0019 | 2.83 | 0.0163 |
| OFusG l       | Occipital Fusiform Gyrus Left                     | 4.96 | 0.0006 | 5.26 | 0.0004 |
| OFusG r       | Occipital Fusiform Gyrus Right                    | 4.81 | 0.0007 | 4.62 | 0.0009 |
| OP l          | Occipital Pole Left                               | 5.47 | 0.0003 | 5.53 | 0.0003 |
| OP r          | Occipital Pole Right                              | 6.99 | 0.0001 | 5.96 | 0.0002 |
| PaCiG l       | Paracingulate Gyrus Left                          | 4.03 | 0.002  | 2.62 | 0.0233 |

|            |                                                                             |      |        |      |        |
|------------|-----------------------------------------------------------------------------|------|--------|------|--------|
| PaCiG r    | Paracingulate Gyrus Right                                                   | 4.02 | 0.002  | 2.36 | 0.0386 |
| Pallidum l | -                                                                           | -    | -      | 2.32 | 0.0418 |
| Pallidum r | -                                                                           | -    | -      | -    | -      |
| PC         | Cingulate Gyrus, posterior division                                         | 4.51 | 0.001  | 2.78 | 0.0173 |
| pITG l     | Inferior Temporal Gyrus, posterior division Left                            | -    | -      | -    | -      |
| pITG r     | Inferior Temporal Gyrus, posterior division Right                           | 2.71 | 0.02   | 3.35 | 0.0061 |
| pMTG l     | Middle Temporal Gyrus, posterior division Left                              | 4.61 | 0.0009 | 4.98 | 0.0006 |
| pMTG r     | Middle Temporal Gyrus, posterior division Right                             | 5.31 | 0.0004 | 5.02 | 0.0006 |
| PO l       | Parietal Operculum Cortex Left                                              | 3.18 | 0.0085 | 3.83 | 0.0028 |
| PO r       | Parietal Operculum Cortex Right                                             | 4.06 | 0.0019 | 4.99 | 0.0006 |
| PostCG l   | Postcentral Gyrus Left                                                      | 2.92 | 0.0138 | 3.79 | 0.003  |
| PostCG r   | Postcentral Gyrus Right                                                     | 2.74 | 0.0188 | 3.25 | 0.0075 |
| PP l       | Planum Polare Left                                                          | 3.75 | 0.0031 | 3.92 | 0.0024 |
| PP r       | Planum Polare Right                                                         | 3.15 | 0.0089 | 3.66 | 0.0035 |
| pPaHC l    | Parahippocampal Gyrus, posterior division Left                              | 4.09 | 0.0019 | 3.74 | 0.0031 |
| pPaHC r    | Parahippocampal Gyrus, posterior division Right                             | 3.71 | 0.0032 | 3.45 | 0.0052 |
| PreCG l    | Precentral Gyrus Left                                                       | 2.69 | 0.0209 | 3.24 | 0.0075 |
| PreCG r    | Precentral Gyrus Right                                                      | 2.63 | 0.0229 | 3.48 | 0.0049 |
| Precuneous | Precuneous Cortex                                                           | 4.17 | 0.0017 | 3.34 | 0.0062 |
| pSMG l     | Supramarginal Gyrus, posterior division Left                                | 4.17 | 0.0017 | 4.03 | 0.002  |
| pSMG r     | Supramarginal Gyrus, posterior division Right                               | 3.71 | 0.0033 | 3.06 | 0.0108 |
| pSTG l     | Superior Temporal Gyrus, posterior division Left                            | 3.27 | 0.0072 | 3.39 | 0.0058 |
| pSTG r     | Superior Temporal Gyrus, posterior division Right                           | 4.81 | 0.0007 | 4.11 | 0.0018 |
| PT l       | Planum Temporale Left                                                       | 3.03 | 0.0114 | 3.44 | 0.0053 |
| PT r       | Planum Temporale Right                                                      | 2.89 | 0.0146 | 3.48 | 0.0049 |
| pTFusC l   | Temporal Fusiform Cortex, posterior division Left                           | 3.93 | 0.0024 | 4.29 | 0.0014 |
| pTFusC r   | Temporal Fusiform Cortex, posterior division Right                          | 3.86 | 0.0026 | 4.01 | 0.002  |
| Putamen l  | -                                                                           | -    | -      | -    | -      |
| Putamen r  | -                                                                           | -    | -      | -    | -      |
| SCC l      | Supracalcarine Cortex Left                                                  | 4.64 | 0.0009 | 4.33 | 0.0014 |
| SCC r      | Supracalcarine Cortex Right                                                 | 3.97 | 0.0022 | 4.03 | 0.002  |
| SFG l      | Superior Frontal Gyrus Left                                                 | 3.65 | 0.0035 | 3.02 | 0.0114 |
| SFG r      | Superior Frontal Gyrus Right                                                | 4.64 | 0.0009 | 3.75 | 0.0031 |
| sLOC l     | Lateral Occipital Cortex, superior division Left                            | 4.06 | 0.0019 | 3.84 | 0.0027 |
| sLOC r     | Lateral Occipital Cortex, superior division Right                           | 4.05 | 0.0019 | 3.82 | 0.0028 |
| SMA l      | Juxtapositional Lobule Cortex -formerly<br>Supplementary Motor Cortex- Left | -    | -      | 2.92 | 0.0138 |

|            |                                                                              |      |        |       |        |
|------------|------------------------------------------------------------------------------|------|--------|-------|--------|
| SMA r      | Juxtapositional Lobule Cortex -formerly<br>Supplementary Motor Cortex -Right | 2.44 | 0.0334 | 3.36  | 0.0061 |
| SPL l      | Superior Parietal Lobule Left                                                | 3.39 | 0.0058 | 3.66  | 0.0035 |
| SPL r      | Superior Parietal Lobule Right                                               | 4.25 | 0.0015 | 4.66  | 0.0009 |
| SubCalC    | Subcallosal Cortex                                                           | 3.06 | 0.0107 | 2.25  | 0.0484 |
| Thalamus l | -                                                                            | -    | -      | -     | -      |
| Thalamus r | -                                                                            | -    | -      | -     | -      |
| TOFusC l   | Temporal Occipital Fusiform Cortex Left                                      | 4.7  | 0.0008 | 4.53  | 0.001  |
| TOFusC r   | Temporal Occipital Fusiform Cortex Right                                     | 4.58 | 0.0009 | 4.6   | 0.0009 |
| toITG l    | Inferior Temporal Gyrus, temporo-occipital part<br>Left                      | 3.17 | 0.0086 | 3.49  | 0.0048 |
| toITG r    | Inferior Temporal Gyrus, temporo-occipital part<br>Right                     | 3.37 | 0.006  | 3.9   | 0.0025 |
| toMTG l    | Middle Temporal Gyrus, temporo-occipital part<br>Left                        | 4.28 | 0.0014 | 5.62  | 0.0003 |
| toMTG r    | Middle Temporal Gyrus, temporo-occipital part<br>Right                       | 3.7  | 0.0033 | 4.95  | 0.0006 |
| TP l       | Temporal Pole Left                                                           | 6.31 | 0.0001 | 7.35  | 0.0001 |
| TP r       | Temporal Pole Right                                                          | 6.73 | 0.0001 | 7.74  | 0.0001 |
| Ver10      | Vermis 10                                                                    | -    | -      | -2.32 | 0.0422 |
| Ver12      | Vermis 1 2                                                                   | -    | -      | -     | -      |
| Ver3       | Vermis 3                                                                     | -    | -      | -     | -      |
| Ver45      | Vermis 4 5                                                                   |      |        | 2.79  | 0.0173 |
| Ver6       | Vermis 6                                                                     | -    | -      | -     | -      |
| Ver7       | Vermis 7                                                                     | 3.44 | 0.0053 | 2.92  | 0.0137 |
| Ver8       | Vermis 8                                                                     | 2.79 | 0.0172 | 2.24  | 0.0487 |
| Ver9       | Vermis 9                                                                     | -    | -      | -     | -      |



Table S3: Results of the ROI-to-voxel using the bilateral thalamus as seed (cluster-size corrected ( $p < 0.05$ , FDR) on the basis of a cluster-forming threshold of  $p < 0.05$ , FDR).

| Cluster | Size (voxels) | MNI <sub>max</sub> | cluster p-FDR | Regions (percent coverage of cluster, cluster size)                                                                                                                                                                                                                                                                                                                                                                                                                                                                                                                                                                                                                                                                                                                                                                                                                                                                                                                                                                                                                                                                                                                                                                                                                                                                                                                                                                                                                                                                                                                                                                                                                                                                |
|---------|---------------|--------------------|---------------|--------------------------------------------------------------------------------------------------------------------------------------------------------------------------------------------------------------------------------------------------------------------------------------------------------------------------------------------------------------------------------------------------------------------------------------------------------------------------------------------------------------------------------------------------------------------------------------------------------------------------------------------------------------------------------------------------------------------------------------------------------------------------------------------------------------------------------------------------------------------------------------------------------------------------------------------------------------------------------------------------------------------------------------------------------------------------------------------------------------------------------------------------------------------------------------------------------------------------------------------------------------------------------------------------------------------------------------------------------------------------------------------------------------------------------------------------------------------------------------------------------------------------------------------------------------------------------------------------------------------------------------------------------------------------------------------------------------------|
| 1       | 25333         | -32,<br>-84,<br>0  | 0             | iLOC r (61, 1254), sLOC r (25, 1216), OP r (49, 1214), sLOC l (23, 1128), OP l (4, 1055), iLOC l (5, 1026), TP r (38, 907), LG r (47, 816), OFusG r (77, 681), TP l (28, 661), OFusG l (63, 586), Precuneous (09, 500), pMTG l (36, 499), TOFusC r (58, 474), pMTG r (3, 408), FOrb l (24, 400), ICC r (5, 379), FP r (05, 369), Cuneal r (55, 350), LG l (21, 318), TOFusC l (49, 317), Cuneal l (61, 315), Hippocampus l (41, 310), toMTG r (27, 308), IFG tri Right) (52, 286), toMTG l (31, 268), AG l (26, 250), Cereb6 r (16, 249), aSTG l (8, 225), IFG oper Left) (29, 222), FOrb r (15, 222), pTFusC l (25, 216), IFG tri Left) (32, 211), Hippocampus r (28, 193), IC l (14, 191), pTFusC r (26, 185), aMTG r (43, 175), FP l (02, 173), IC r (11, 150), aMTG l (31, 139), AG r (09, 131), Amygdala r (34, 117), pSMG l (1, 105), Cereb6 l (08, 104), Amygdala l (31, 103), toITG r (13, 102), PC (Cingulate (04, 100), ICC l (15, 95), aSTG r (33, 91), PP l (25, 89), pSTG r (21, 87), toITG l (12, 85), aTFusC r (28, 81), SCC r (55, 79), pSTG l (2, 78), PP r (2, 74), pPaHC r (2, 64), IFG oper Right) (08, 57), alTG r (17, 56), Cereb45 l (06, 51), aSMG l (05, 47), pPaHC l (11, 43), pITG r (04, 41), pSMG r (03, 40), Cereb45 r (06, 38), Cereb1 r (01, 32), PO l (05, 30), SCC l (38, 28), MidFG l (01, 27), alTG l (07, 25), FO l (06, 23), Thalamus l (02, 22), pITG l (02, 21), CO r (02, 21), CO l (02, 19), MidFG r (01, 18), Cereb1 l (01, 18), Thalamus r (01, 17), Putamen r (01, 10), aPaHC r (01, 8), aPaHC l (01, 8), PT l (01, 8), PreCG l (0, 7), Brain-Stem (0, 4), HG l (01, 3), Ver45 (Vermis (0, 3), SubCalC (Subcallosal (0, 2), Putamen l (0, 1), not-labelled (01, 4174) |
| 2       | 820           | 36,<br>-42,<br>60  | 0             | PostCG r (12, 383), SPL r (21, 309), sLOC r (01, 37), PreCG r (0, 3), pSMG r (0, 2), not-labelled (0, 86)                                                                                                                                                                                                                                                                                                                                                                                                                                                                                                                                                                                                                                                                                                                                                                                                                                                                                                                                                                                                                                                                                                                                                                                                                                                                                                                                                                                                                                                                                                                                                                                                          |
| 3       | 684           | -50,<br>0,<br>48   | 0             | PreCG l (07, 298), PostCG l (05, 196), MidFG l (06, 183), aSMG l (0, 1), not-labelled (0, 6)                                                                                                                                                                                                                                                                                                                                                                                                                                                                                                                                                                                                                                                                                                                                                                                                                                                                                                                                                                                                                                                                                                                                                                                                                                                                                                                                                                                                                                                                                                                                                                                                                       |

|    |     |                    |          |                                                                                                                |
|----|-----|--------------------|----------|----------------------------------------------------------------------------------------------------------------|
| 4  | 626 | -26,<br>68,<br>-2  | 0        | FP I (04, 245), MedFC (Frontal (17, 165), FP r (01, 109), PaCiG r (0, 4), PaCiG I (0, 4), not-labelled (0, 99) |
| 5  | 562 | -28,<br>-42,<br>52 | 0        | PostCG I (07, 256), SPL I (1, 152), PreCG I (01, 31), not-labelled (0, 123)                                    |
| 6  | 442 | 40,<br>-2,<br>56   | 0        | PreCG r (07, 287), MidFG r (01, 33), SFG r (01, 26), PostCG r (01, 17), not-labelled (0, 79)                   |
| 7  | 432 | 54,<br>-20,<br>26  | 0        | aSMG r (21, 169), PO r (29, 155), PostCG r (01, 41), PT r (04, 16), CO r (01, 12), not-labelled (0, 39)        |
| 8  | 278 | 18,<br>54,<br>36   | 0.000002 | FP r (01, 92), PaCiG r (06, 88), SFG r (02, 64), SFG I (0, 4), not-labelled (0, 30)                            |
| 9  | 241 | -8,<br>74,<br>12   | 0.00001  | FP I (02, 119), FP r (01, 49), PaCiG I (01, 9), not-labelled (0, 64)                                           |
| 10 | 209 | -18,<br>18,<br>-12 | 0.000033 | FOrb I (02, 42), SubCalC (Subcallosal (01, 7), Caudate I (0, 2), Accumbens I (01, 1), not-labelled (0, 157)    |
| 11 | 158 | -20,<br>4,<br>-44  | 0.000298 | TP I (02, 57), aPaHC I (09, 50), aTFusC I (09, 27), not-labeled (0, 24), pSMG r (0, 2), not-labelled (0, 86)   |
| 12 | 134 | -4,<br>-38,<br>44  | 0.000875 | PC (Cingulate (03, 73), Precuneous (01, 33), PreCG I (0, 9), PostCG I (0, 7), not-labelled (0, 12)             |
| 13 | 131 | -2,<br>-20,<br>10  | 0.000939 | Thalamus I (03, 46), Thalamus r (02, 29), not-labelled (0, 56)                                                 |
| 14 | 126 | 16,<br>68,<br>16   | 0.001122 | FP r (01, 118), not-labelled (0, 8)                                                                            |
| 15 | 118 | 62,<br>-2,         | 0.00158  | CO r (04, 37), HG r (06, 18), PP r (04, 15), PT r (03, 12),                                                    |

|    |     |                    |          |                                                                                                                                                                  |
|----|-----|--------------------|----------|------------------------------------------------------------------------------------------------------------------------------------------------------------------|
|    |     | 6                  |          | aSTG r (01, 2), PreCG r (0, 1), not-labelled (0, 33)                                                                                                             |
| 16 | 109 | -8,<br>66,<br>-42  | 0.00238  | Cereb8 l (02, 38), Ver8 (Vermis (06, 14), Cereb8 r (0, 10),<br>Cereb9 r (01, 8), Cereb7 r (0, 2), Cereb7 l (0, 1), Ver9<br>(Vermis (01, 1), not-labelled (0, 35) |
| 17 | 91  | 16,<br>38,<br>48   | 0.006024 | PC (Cingulate (01, 26), Precuneous (0, 25), PostCG r (0,<br>11), PreCG r (0, 7), not-labelled (0, 22)                                                            |
| 18 | 89  | 56,<br>8,<br>36    | 0.006375 | PreCG r (01, 53), MidFG r (01, 35), not-labelled (0, 1)                                                                                                          |
| 19 | 85  | -30,<br>52,<br>-62 | 0.007603 | Cereb8 l (0, 6), not-labelled (0, 79)                                                                                                                            |
| 20 | 72  | -12,<br>62,<br>28  | 0.015672 | FP l (01, 71), not-labelled (0, 1)                                                                                                                               |
| 21 | 70  | 2,<br>8,<br>38     | 0.016114 | AC (Cingulate (02, 64), PaCiG r (0, 6)                                                                                                                           |
| 22 | 70  | 8,<br>-6,<br>32    | 0.016114 | not-labelled (0, 70)                                                                                                                                             |
| 23 | 64  | -10,<br>0,<br>26   | 0.022466 | not-labelled (0, 64)                                                                                                                                             |
| 24 | 60  | -36,<br>14,<br>20  | 0.02786  | IFG oper Left) (0, 1), not-labelled (0, 59)                                                                                                                      |
| 25 | 51  | 44,<br>30,<br>4    | 0.048828 | pSTG r (02, 9), pMTG r (01, 9), not-labelled (0, 33)                                                                                                             |

Table S4: Correlation between functional connectivity measures and the tenth item (“ I felt sleepy” ) of 5D-ASC

| Analysis                        | Placebo |      | LSD   |      |
|---------------------------------|---------|------|-------|------|
|                                 | r       | p    | r     | p    |
| ROI-to-voxel                    | -0.30   | 0.20 | -0.20 | 0.40 |
| Global correlation              | -0.09   | 0.71 | -0.14 | 0.56 |
| Thalamus -right insula          | 0.02    | 0.93 | 0.01  | 0.97 |
| Thalamus – right fusiform gyrus | 0.08    | 0.74 | -0.13 | 0.58 |
